# Supplementary material for: Development of tailored SPION-PNIPAM nanoparticles by ATRP for dually responsive doxorubicin delivery and MR imaging
Source: Royal Society of Chemistry journal article supplement (doi:10.1039/c7tb00646b), 2017-12-04
Supplement: c7tb00646b1.pdf [file c7tb00646b1.pdf]

## Supporting Data

# Development of Tailored SPION/PNIPAM Nanoparticles by ATRP for Dually Responsive Doxorubicin Delivery and MR Imaging

Yasemin Yar<sup>a</sup>, Rouhollah Khodadust<sup>b</sup>, Yunus Akkoc<sup>c</sup>, Devrim Gozuacik<sup>c,d</sup>, Mustafa Utkur<sup>e</sup>, Emine Ulku Saritas<sup>e</sup>, Havva Yagci Acar,<sup>a,b,d,f\*</sup>

<sup>a</sup>Koc University, Graduate School of Materials Science and Engineering, Rumelifeneri Yolu, Sariyer, Istanbul, Turkey

<sup>b</sup>Koc University, Department of Chemistry, Rumelifeneri Yolu, Sariyer, Istanbul, Turkey

<sup>c</sup>Sabanci University, Faculty of Engineering and Natural Sciences, Molecular Biology, Genetics and Bioengineering Programs, Istanbul, Turkey

<sup>d</sup>Sabanci University, Center of Excellence for Functional Surfaces and Interfaces for Nano Diagnostics (EFSUN), Istanbul, Turkey

<sup>e</sup>Department of Electrical & Electronics Engineering and National Magnetic Resonance Research Center (UMRAM), Bilkent University, Ankara, Turkey

<sup>f</sup>Koc University, Surface Science and Technology Center (KUYTAM), Rumelifeneri Yolu, Sariyer, Istanbul, Turkey. **\*Corresponding Author: Havva Yağcı Acar: [fyagci@ku.edu.tr](mailto:fyagci@ku.edu.tr)**

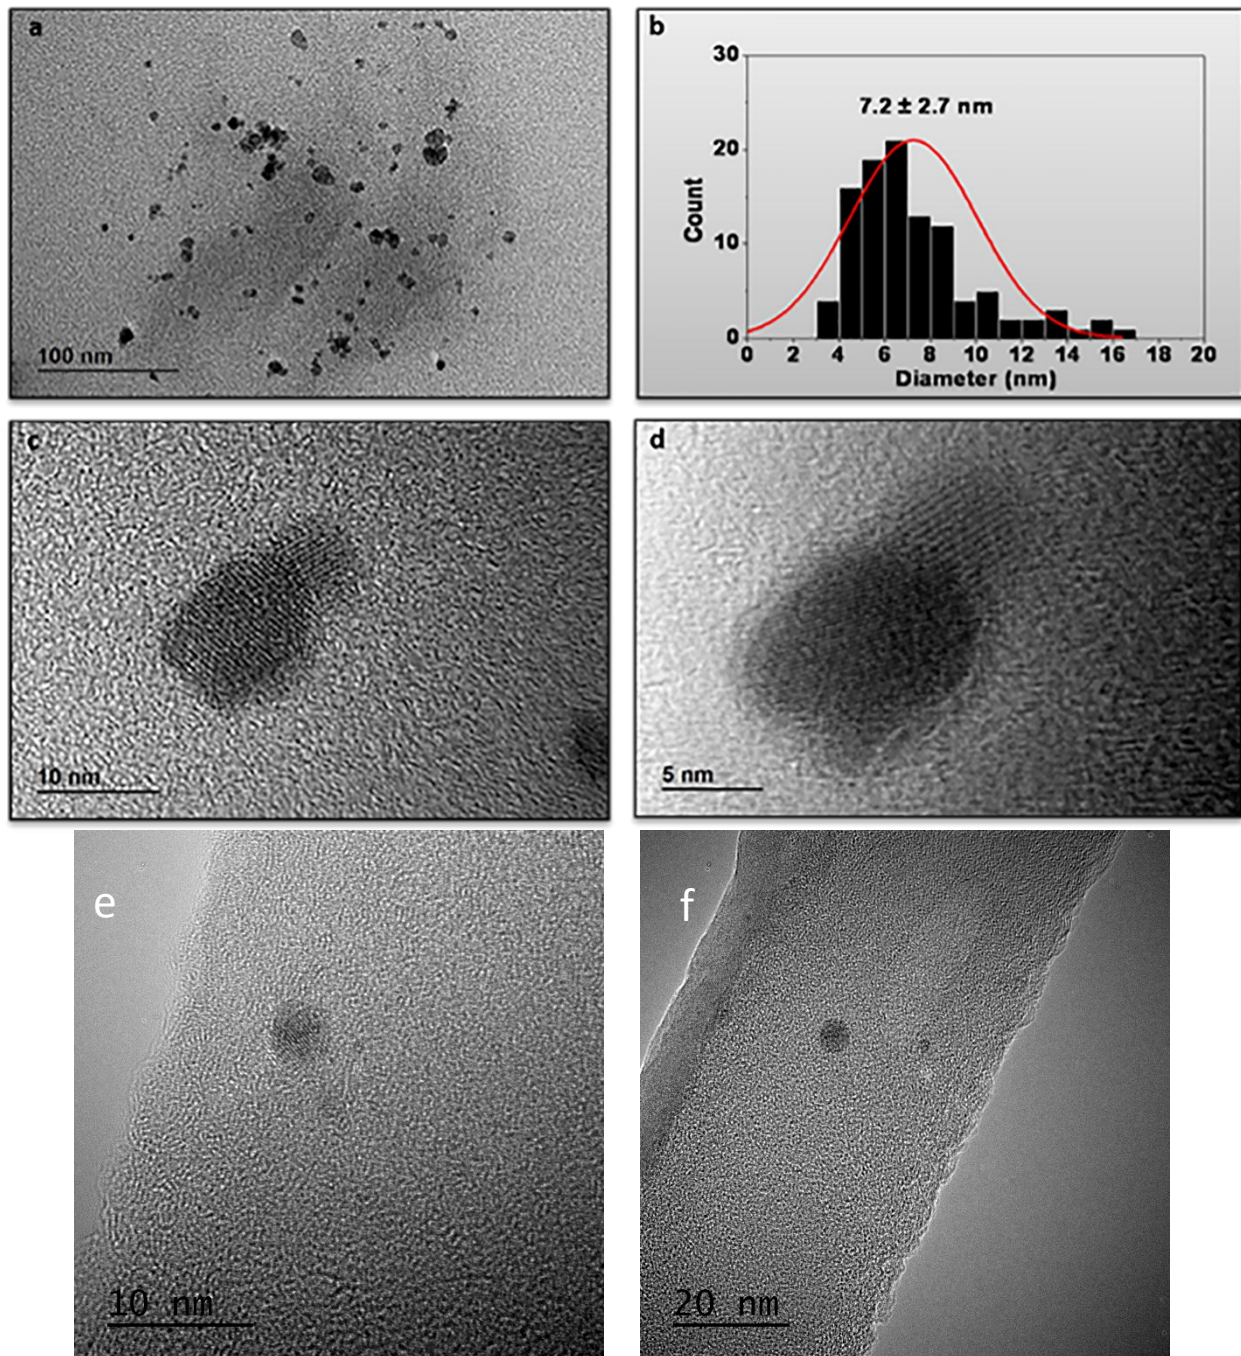

**Fig S1.** TEM images of nanoparticles at different magnification (S1a, c, and d). Crystal size of the iron oxide core was determined as  $7.2 \pm 2.7$  (S1b). TEM images of SPION-PNIPAM01-DOX nanoparticles.

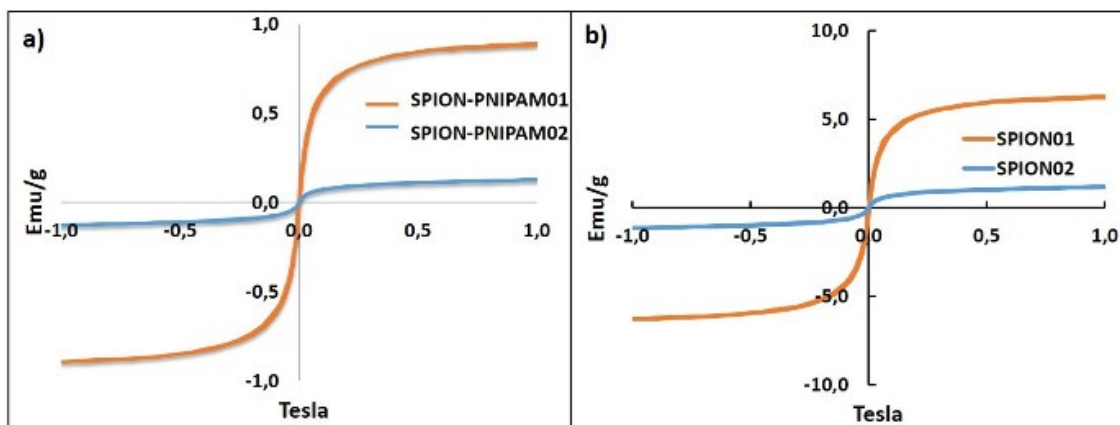

**Fig S2. (a)** Magnetization of SPION-PNIPAM01 and SPION-PNIPAM02 as a function of magnetic field applied on total content of nanoparticles. **(b)** Magnetization of SPION-PNIPAM01 and SPION-PNIPAM02 as a function of magnetic field applied on SPION content of nanoparticles.

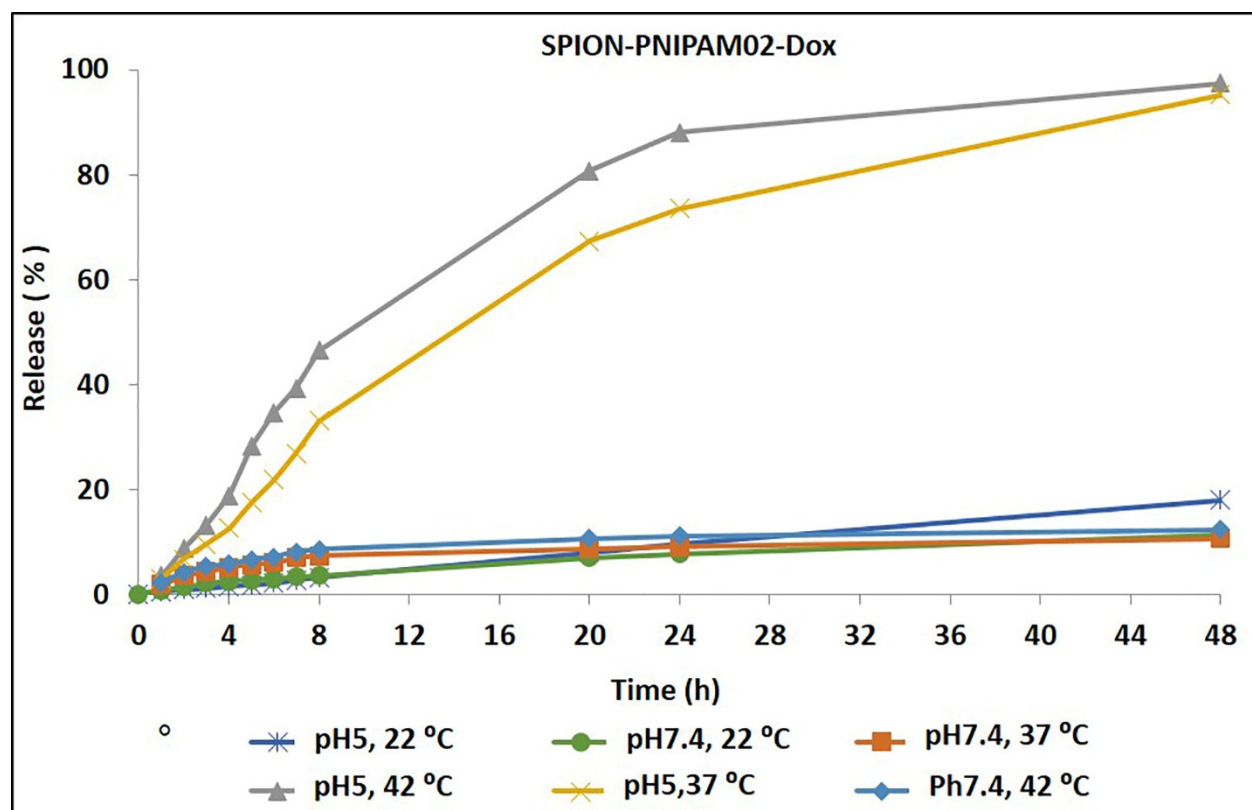

**Fig S3.** Release of Dox from SPION-PNIPAM02 in different solutions with pH 5 and pH 7.4 and 22°C, 37°C and 42°C temperature.

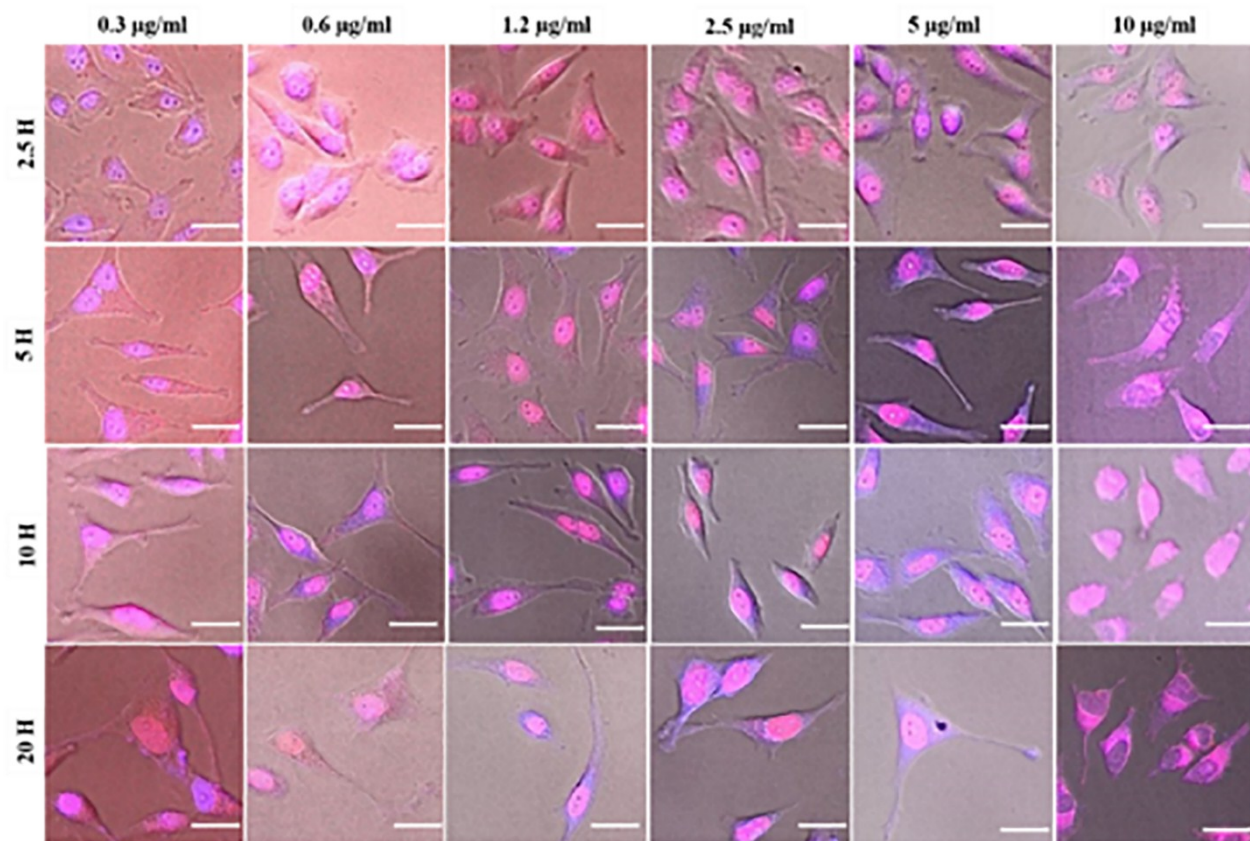

**Fig S4.** Uptake of “free” Doxorubicin by HeLa Cells. Confocal laser microscopy image of HeLa cells incubated with different concentration (0.3, 0.6, 1.2, 2.5, 5 and 10 µg/ml) of Doxorubicin at different time points (2.5h, 5h, 10h and 20 h) at 37°C (Scale bar 40 µm).
